# Supplementary material for: Synthesis, characterization, reactivity and catalytic activity of a novel chiral manganese Schiff base complex
Source: Royal Society of Chemistry journal article supplement (doi:10.1039/c5nj01031d), 2015-01-01
Supplement: c5nj01031d1.pdf [file c5nj01031d1.pdf]

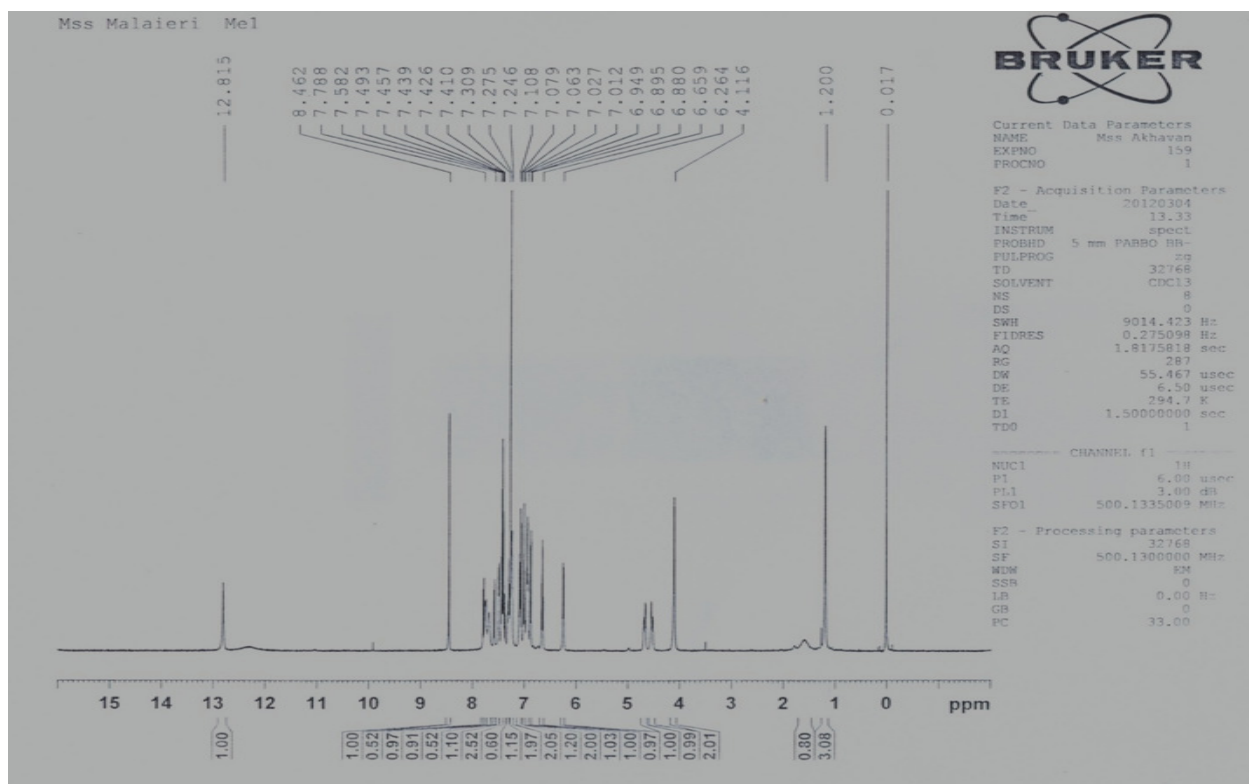

Fig. 1.  $^1\text{H}$  NMR of  $\text{H}_2\text{L}$

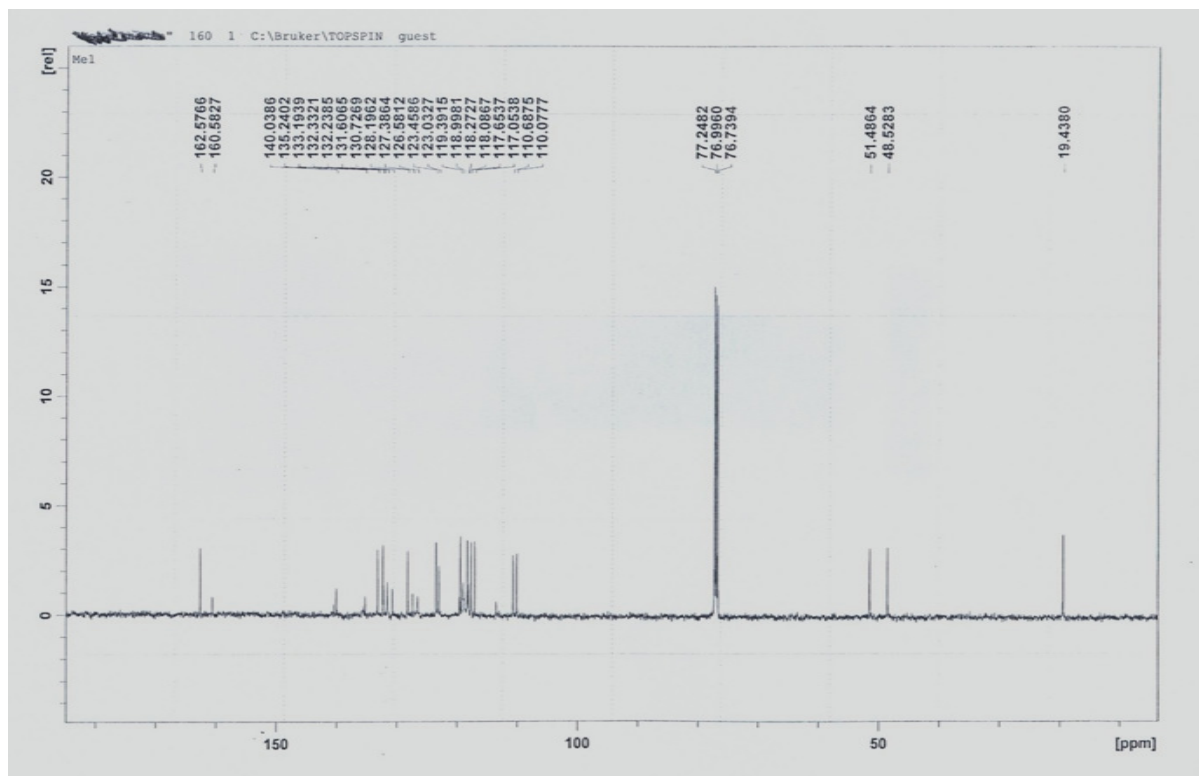

Fig. 2.  $^{13}\text{C}$  NMR of  $\text{H}_2\text{L}$

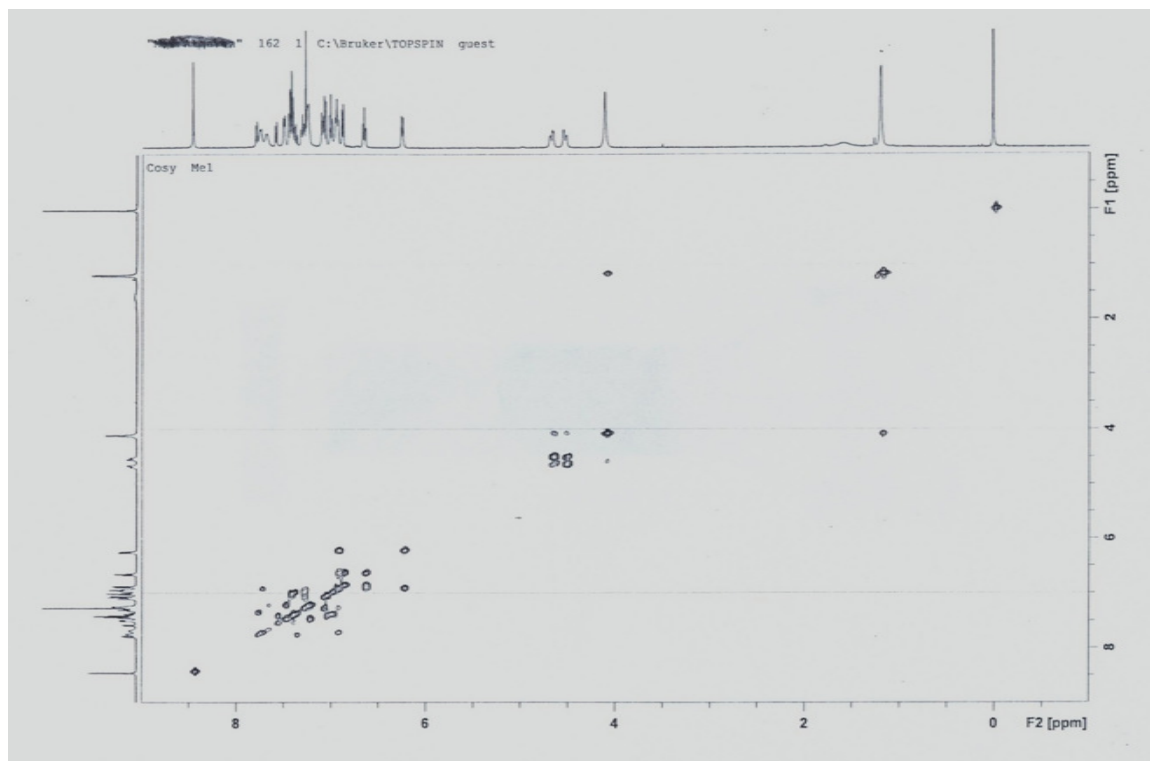

Fig. 3. COSY spectrum of H<sub>2</sub>L

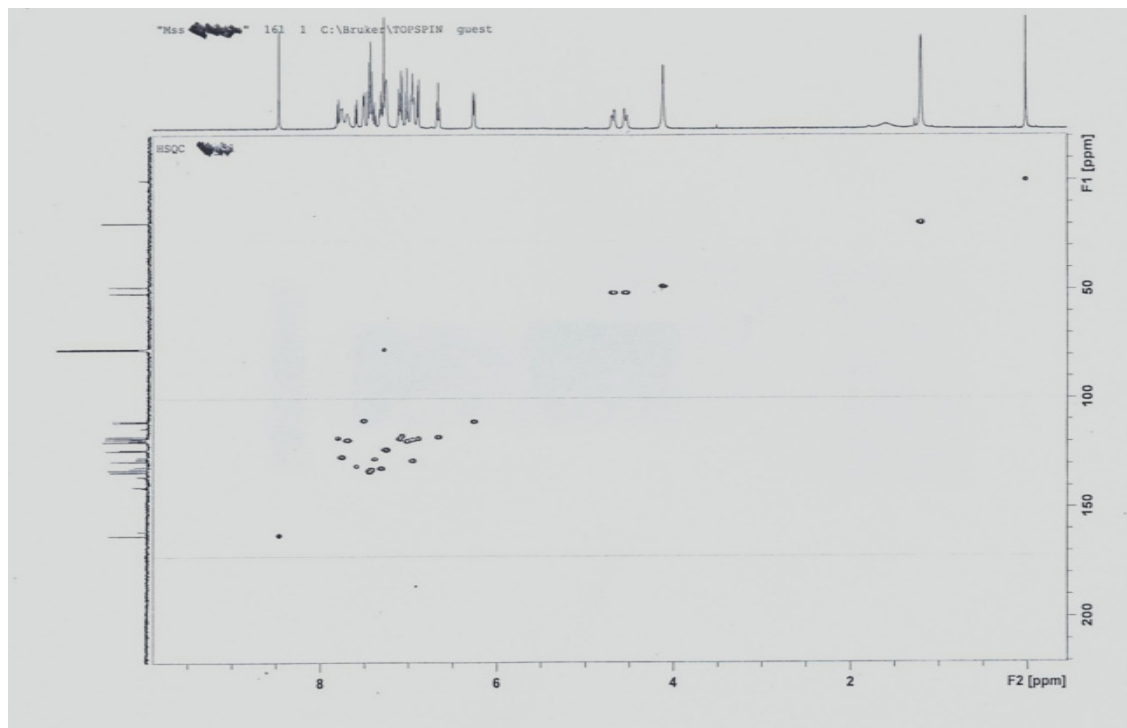

Fig. 4. HSQC spectrum of H<sub>2</sub>L

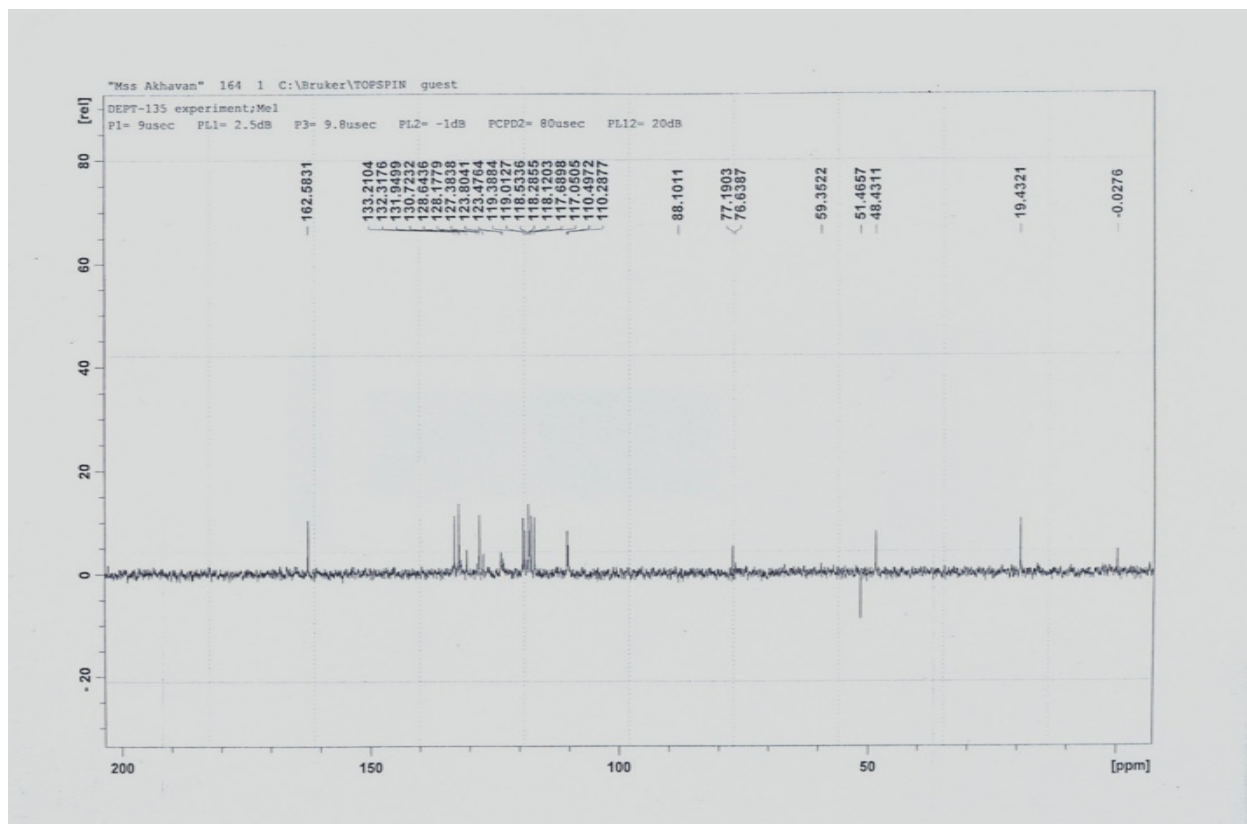

Fig. 5. DEPT spectrum of H<sub>2</sub>L

**Table 1**

| Bond length (Å) |       | Bond angle (°)  |        |
|-----------------|-------|-----------------|--------|
| Mn(1)-N(1)      | 1.986 | N(1)-Mn(1)-N(2) | 73.08  |
| Mn(1)-N(2)      | 2.018 | N(2)-Mn(1)-N(3) | 151.87 |
| Mn(1)-N(3)      | 1.934 | N(2)-Mn(1)-N(4) | 76.79  |
| Mn(1)-N(4)      | 2.079 | N(4)-Mn(1)-O(1) | 160    |
| Mn(1)-O(1)      | 1.782 | O(1)-Mn(1)-N(3) | 90.27  |
| Mn(1)-O(2)      | 1.87  | O(2)-Mn(1)-O(1) | 87.83  |
|                 |       | O(2)-Mn(1)-N(4) | 79.96  |
|                 |       | O(2)-Mn(1)-N(2) | 116.55 |
|                 |       | O(2)-Mn(1)-N(3) | 91.22  |

**Table 2**

| Entry | Amount of<br>[Mn <sup>III</sup> L]Cl (mmol) | Amount of<br>oxidant (mmol) | Yield (%) |
|-------|---------------------------------------------|-----------------------------|-----------|
| 1     | 0                                           | 10                          | -         |
| 2     | 0.05                                        | 10                          | 43        |
| 3     | 0.07                                        | 10                          | 60        |
| 4     | 0.1                                         | 10                          | 71        |
| 5     | 0.2                                         | 10                          | 72        |
| 6     | 0                                           | 10                          | -         |
| 7     | 0.1                                         | 5                           | 52        |
| 8     | 0.1                                         | 8                           | 61        |

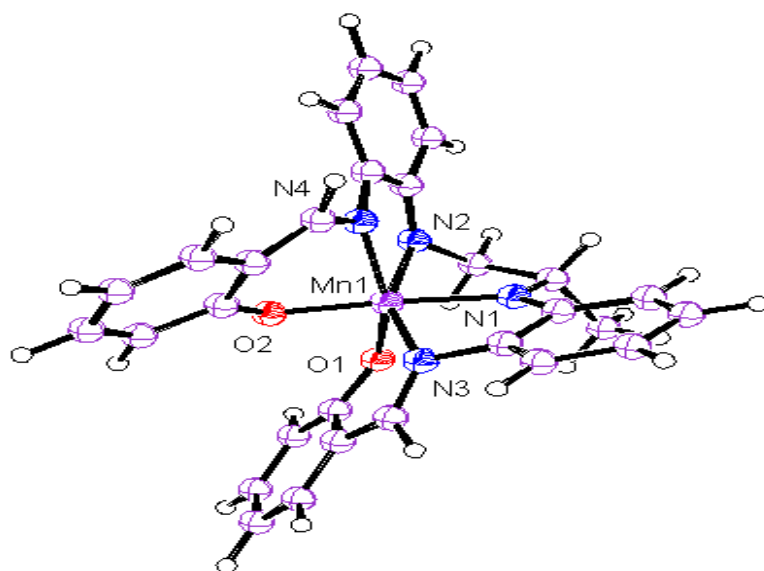

Figure 1
